# Supplementary material
Source: PubMed Central journal article supplement (PMC3907294)
Supplement: pcbi.1003447.s015.pdf [file pcbi.1003447.s015.pdf]

Table S2: Corpus-specific parameters

| Parameter name                                                                                                                                                                                                                                                                                                                                                                                                   | Eq. | Symbol                                                                                                                                | Hex grid                                                          | Square grid <sup>a</sup> | Dimension <sup>b</sup>                                                                              |
|------------------------------------------------------------------------------------------------------------------------------------------------------------------------------------------------------------------------------------------------------------------------------------------------------------------------------------------------------------------------------------------------------------------|-----|---------------------------------------------------------------------------------------------------------------------------------------|-------------------------------------------------------------------|--------------------------|-----------------------------------------------------------------------------------------------------|
| <i>Change in cellular auxin concentration</i><br>Rate of auxin biosynthesis<br>Rate of auxin turnover                                                                                                                                                                                                                                                                                                            | 1   | $H_i$<br>$\mu$                                                                                                                        | 0.05<br>0                                                         | 0.04                     | $M T^{-1}$<br>$T^{-1}$                                                                              |
| <i>Outflux/Influx through a cell membrane</i><br>Transport rate of PIN1a<br>Transport rate of PIN1b<br>Transport rate of SoPIN1<br>Basal transport                                                                                                                                                                                                                                                               | 3   | $T_{PIN1a}$<br>$T_{PIN1b}$<br>$T_{SoPIN1}$<br>$T$                                                                                     | 0.085<br>0.08<br>0.2<br>0.4                                       |                          | $M^{-1}T^{-1}$<br>$M^{-1}T^{-1}$<br>$M^{-1}T^{-1}$<br>$T^{-1}$                                      |
| <i>Change in the concentration of PIN1b on a cell membrane</i><br>Maximum concentration<br>Basal allocation rate<br>Outflux-based allocation rate<br>Influx-based deallocation rate<br>Basal deallocation rate                                                                                                                                                                                                   | 4   | $PIN1b_{max}$<br>$\sigma_{1b}$<br>$\alpha_{1b}$<br>$\beta_{1b}$<br>$\nu_{1b}$                                                         | 30<br>0<br>1.05<br>6.0<br>0.125                                   | 5.25                     | $M$<br>$T^{-1}$<br>$M^{-1}T^{-1}$<br>$M^{-1}T^{-1}$<br>$T^{-1}$                                     |
| <i>Change in the concentration of PIN1a on a cell membrane</i><br>Maximum concentration<br>Basal allocation rate<br>Net-flux-based allocation rate<br>Influx-based deallocation rate<br>Basal deallocation rate<br>Saturation rate of net-flux based allocation<br>Saturation rate of outflux-based deallocation with respect to auxin<br>Saturation rate of outflux-based deallocation with respect to net-flux | 5   | $PIN1a_{max}$<br>$\sigma_{1a}$<br>$\gamma_{1a}$<br>$\beta_{1a}$<br>$\nu_{1a}$<br>$\kappa_{1a}$<br>$\kappa_{IAA1a}$<br>$\kappa_{\Phi}$ | 500<br>0<br>0.00072<br>0.00075<br>0.02<br>0.00001<br>0.1<br>0.001 |                          | $M$<br>$T^{-1}$<br>$M^{-1}T^{-1}$<br>$M^{-1}T^{-1}$<br>$T^{-1}$<br>$M^{-1}$<br>$M^{-1}$<br>$M^{-1}$ |
| <i>Change in the concentration of PIN1b in the ER</i><br>Basal production<br>Rate of auxin-based upregulation<br>Production saturation rate<br>Turnover rate                                                                                                                                                                                                                                                     | 7   | $\rho_{1b}$<br>$\rho_{IAA1b}$<br>$\kappa_{PIN1b}$<br>$\mu_{1b}$                                                                       | 2.5<br>16<br>0.0125<br>0.225                                      |                          | $M T^{-1}$<br>$T^{-1}$<br>$M^{-1}$<br>$T^{-1}$                                                      |
| <i>Change in the concentration of PIN1a in the ER</i><br>Basal production<br>Rate of auxin based upregulation<br>Production saturation rate<br>Turnover rate                                                                                                                                                                                                                                                     | 8   | $\rho_{1a}$<br>$\rho_{IAA1a}$<br>$\kappa_{PIN1a}$<br>$\mu_{1a}$                                                                       | 0.208<br>30<br>0.00025<br>0.15625                                 |                          | $M T^{-1}$<br>$T^{-1}$<br>$M^{-1}$<br>$T^{-1}$                                                      |
| <i>Concentration of SoPIN1 on a cell membrane</i><br>Maximum concentration<br>Exponential base of allocation weight function                                                                                                                                                                                                                                                                                     | 9   | $SoPIN1_{max}$<br>$B$                                                                                                                 | 60<br>4.263                                                       |                          | $M$                                                                                                 |
| <i>Change in the cellular concentration of SoPIN1</i><br>Basal production<br>Rate of auxin based upregulation<br>Production saturation rate<br>Turnover rate                                                                                                                                                                                                                                                     | 10  | $\rho_{So1}$<br>$\rho_{IAASo1}$<br>$\kappa_{SoPIN1}$<br>$\mu_{So1}$                                                                   | 0.025<br>0.15<br>0.075<br>0.1                                     |                          | $M T^{-1}$<br>$T^{-1}$<br>$M^{-1}$<br>$T^{-1}$                                                      |

<sup>a</sup> Parameters for the simulation using a square grid (Fig. S12, Video S4) are the same as those used in the simulation on a hexagonal grid (Fig. 5, 6 and Videos S2, S3) except where shown otherwise.

<sup>b</sup> Dimensions are specified using  $M$  for mass and  $T$  for time (spatial dimensions are assumed to be unit and are thus omitted).
